# Supplementary material for: Safety Profile of Rapamycin Perfluorocarbon Nanoparticles for Preventing Cisplatin-Induced Kidney Injury
Source: MDPI journal article supplement (doi:10.3390/nano12030336), 2022-01-21
Supplement: s1 [file s1]

# Supplementary Materials

## Safety Profile of Rapamycin Perfluorocarbon Nanoparticles for Preventing Cisplatin-Induced Kidney Injury

Qingyu Zhou <sup>1,\*</sup>, Justin Doherty <sup>2</sup>, Antonina Akk <sup>3</sup>, Luke E. Springer <sup>3</sup>, Ping Fan <sup>4</sup>, Ivan Spasojevic <sup>4</sup>, Ganesh V. Halade <sup>2</sup>, Huanghe Yang <sup>4</sup>, Christine T.N. Pham <sup>3,5</sup>, Samuel A. Wickline <sup>2,6</sup> and Hua Pan <sup>2,\*</sup>

<sup>1</sup> Department of Pharmaceutical Sciences, Taneja College of Pharmacy, University of South Florida, Tampa, FL 33612, USA;

<sup>2</sup> USF Health Heart Institute, University of South Florida, Tampa, FL 33602, USA.; justindohert@usf.edu (J.D.); ghalade@usf.edu (G.V.H.); wickline@usf.edu (S.A.W.)

<sup>3</sup> Department of Medicine, Washington University School of Medicine, St. Louis, MO 63110, USA.; antoninaakk@wustl.edu (A.A.); lspringer@wustl.edu (L.E.S.); cpham@wustl.edu (C.T.N.P.)

<sup>4</sup> School of Medicine, Duke University, Durham, NC 27708, USA.; ping.fan@duke.edu (P.F.); ivan.spasojevic@duke.edu (I.S.); huanghe.yang@duke.edu (H.Y.)

<sup>5</sup> John Cochran Veterans Affairs Medical Center, St. Louis, MO 63106, USA

<sup>6</sup> Altamira Therapeutics Inc, Dover, DE 19901, USA

\* Correspondence: qzhou1@usf.edu (Q.Z.); huapan@usf.edu (H.P.); Tel.: 1-813-974-7081 (Q.Z.); Tel.: 1-813-396-9755 (H.P.)

**Table S1.** Systemic disposition kinetics of rapamycin in mice after single IV bolus injection of 0.1 mg/kg of unformulated rapamycin and rapamycin nanoparticle

|                        | Unformulated Rapamycin<br>(N = 7) | Rapamycin Nanoparticles<br>(N = 5) |
|------------------------|-----------------------------------|------------------------------------|
| A (µg/L)               | 352 ± 86.9                        | 162 ± 35.0 ***                     |
| B (µg/L)               | 130 ± 41.2                        | 37.0 ± 14.6 ***                    |
| AUC (µg·h/L)           | 2021 ± 713                        | 423 ± 117 ***                      |
| t <sub>1/2,α</sub> (h) | 1.02 ± 0.33                       | 0.34 ± 0.12 ***                    |
| t <sub>1/2,β</sub> (h) | 7.97 ± 2.51                       | 6.78 ± 1.51                        |
| V <sub>c</sub> (L/kg)  | 0.237 ± 0.071                     | 0.557 ± 0.129 ***                  |
| V <sub>ss</sub> (L/kg) | 0.448 ± 0.083                     | 2.00 ± 0.678 ***                   |
| V <sub>β</sub> (L/kg)  | 0.633 ± 0.137                     | 2.57 ± 0.817 ***                   |
| CL (L/h/kg)            | 0.060 ± 0.022                     | 0.263 ± 0.063 ***                  |

**Note:** Data are presented as mean ± standard deviation (SD). \*\*\*P < 0.001 compared with the unformulated free rapamycin group using the independent sample *t* test for difference in means between two groups.

**Table S2.** Comparison of rapamycin tissue concentrations obtained at 20 hours post dose and the corresponding tissue-to-blood concentration ratio values between unformulated free rapamycin and rapamycin nanoparticle groups

|                  | Rapamycin Concentration<br>(ng/mL blood or ng/g tissue) |                                    | Tissue-to-plasma concentration ratio |                                    |
|------------------|---------------------------------------------------------|------------------------------------|--------------------------------------|------------------------------------|
|                  | Unformulated Rapamycin<br>(N = 4)                       | Rapamycin Nanoparticles<br>(N = 5) | Unformulated Rapamycin<br>(N = 4)    | Rapamycin Nanoparticles<br>(N = 5) |
| <b>Blood</b>     | 16.2 ± 7.58                                             | 4.73 ± 1.58 *                      | ---                                  | ---                                |
| <b>Liver</b>     | 14.5 ± 5.29                                             | 4.13 ± 0.83 **                     | 1.05 ± 0.69                          | 0.974 ± 0.387                      |
| <b>Kidney</b>    | 26.0 ± 6.35                                             | 10.2 ± 1.62 ***                    | 1.73 ± 0.48                          | 2.35 ± 0.73                        |
| <b>Lung</b>      | 83.0 ± 18.2                                             | 26.3 ± 3.93 ***                    | 5.52 ± 1.29                          | 6.52 ± 3.66                        |
| <b>Heart</b>     | 47.7 ± 13.3                                             | 20.9 ± 3.75 **                     | 3.20 ± 1.14                          | 4.79 ± 1.46                        |
| <b>Brain</b>     | 3.98 ± 6.02                                             | 0.149 ± 0.036                      | 0.35 ± 0.58                          | 0.038 ± 0.025                      |
| <b>Intestine</b> | 64.4 ± 88.8                                             | 5.04 ± 1.53                        | 5.45 ± 8.64                          | 1.37 ± 1.14                        |
| <b>Stomach</b>   | 27.3 ± 11.0                                             | 8.02 ± 2.02 **                     | 1.95 ± 1.29                          | 2.03 ± 1.26                        |
| <b>Spleen</b>    | 39.8 ± 22.4                                             | 12.2 ± 3.90 *                      | 2.81 ± 2.32                          | 2.74 ± 0.93                        |
| <b>Bladder</b>   | 55.6 ± 20.6                                             | 11.7 ± 8.54 **                     | 3.72 ± 1.56                          | 3.56 ± 4.51                        |

**Note:** Data are presented as mean ± standard deviation (SD). \*P < 0.05, \*\*P < 0.01, \*\*\*P < 0.01 compared with the unformulated rapamycin group using the independent sample *t* test for difference in means between two groups.
